# Supplementary material for: Impact of Impurities on Crystallization and Product Quality: A Case Study with Paracetamol
Source: MDPI journal article supplement (doi:10.3390/cryst11111344), 2021-11-03
Supplement: s1 [file s1]

# Impact of Impurities on Crystallization and Product Quality: A Case Study with Paracetamol

Stephanie J. Urwin <sup>1</sup>, Stephanie Yerdelen <sup>1</sup>, Ian Houson <sup>1</sup> and Joop H. ter Horst <sup>1,2,\*</sup>

<sup>1</sup> EPSRC Centre for Innovative Manufacturing in Continuous Manufacturing and Crystallization, University of Strathclyde, Glasgow G1 1RD, UK; stephanie.urwin@chem.ox.ac.uk (S.J.U.); stephanie.x.yerdelen@gsk.com (S.Y.); ian.houson@strath.ac.uk (I.H.)

<sup>2</sup> Laboratoire Sciences et Méthodes Séparatives, Université de Rouen Normandie, Place Emile Blondel, CEDEX, 76821 Mont Saint Aignan, France

\* Correspondence: joop.terhorst@strath.ac.uk

**Citation:** Urwin, S.J.; Yerdelen, S.; Houson, I.; Horst, J.H.t. Impact of Impurities on Crystallization and Product Quality: A Case Study with Paracetamol. *Crystals* **2021**, *11*, 1344. <https://doi.org/10.3390/cryst11111344>

Academic Editor: Hiroshi Ooshima

Received: 20 September 2021

Accepted: 19 October 2021

Published: 3 November 2021

**Publisher's Note:** MDPI stays neutral with regard to jurisdictional claims in published maps and institutional affiliations.

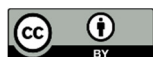

**Copyright:** © 2021 by the authors. Licensee MDPI, Basel, Switzerland. This article is an open access article distributed under the terms and conditions of the Creative Commons Attribution (CC BY) license (<https://creativecommons.org/licenses/by/4.0/>).

## 1. Crystallization

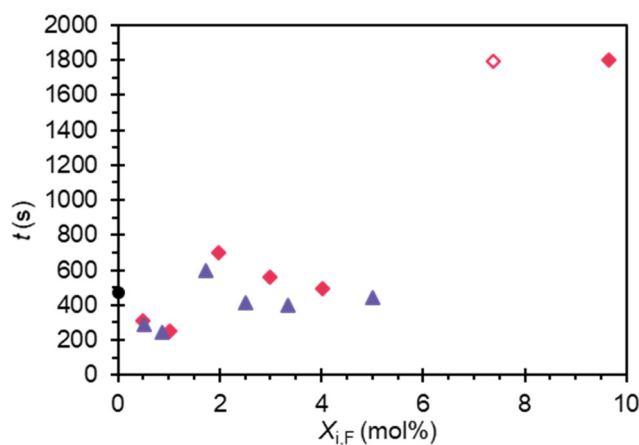

**Figure S1.** Induction time ( $t$ ) as a function of initial impurity concentration ( $X_{i,F}$ ). (●) Pure component paracetamol, (▲) paracetamol with acetanilide added and (◆) or (◇) paracetamol with metacetamol added.

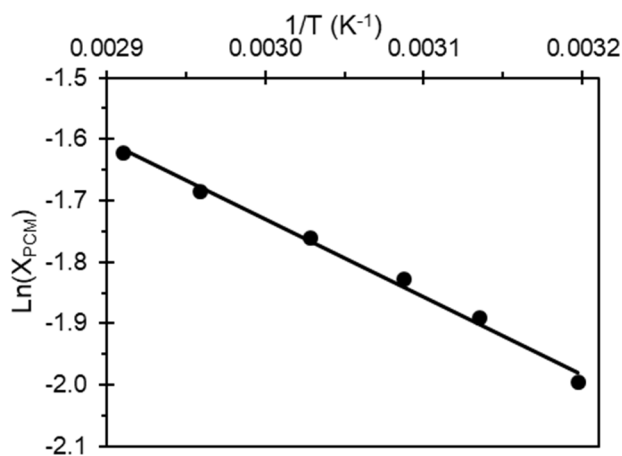

**Figure S2.** Van't Hoff solubility plot of paracetamol in 2-propanol. Linear regression  $\text{Ln}(X_{\text{PCM}}) = -1261.9 T^{-1} + 2.0429$ ,  $R^2 = 0.993$ .

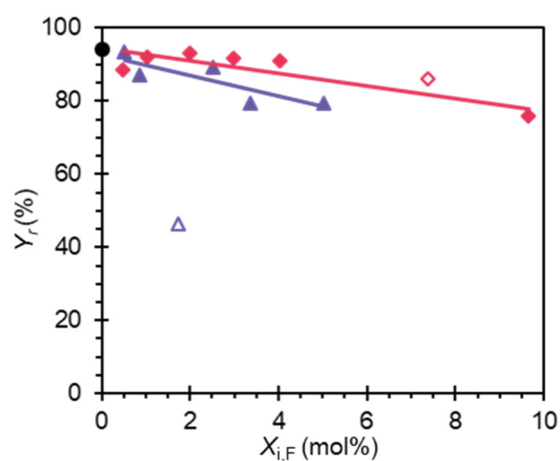

**Figure S3.** Product recovery as a function of initial impurity concentration, from crystallizations nucleated at  $\sigma = 2.10$ . (●) Pure paracetamol from 2-propanol. (♦) In the presence of metacetamol. Linear regression  $Y_r = -1.6971 X_{i,F} + 94.359$ ,  $R^2 = 0.7618$ . (▲) In the presence of acetanilide, and (△) was identified as an outlier and removed from fitted line. Linear regression  $Y_r = -2.8573 X_{i,F} + 92.789$ ,  $R^2 = 0.7036$ .

## 2. Product Purity

**Table S1.** Summary of paracetamol cooling crystallizations from 2-propanol in the presence of metacetamol or acetanilide

|    | Impurity    | Initial Suspension |           | Crystallized Solid |           | Mother Liquor |           |
|----|-------------|--------------------|-----------|--------------------|-----------|---------------|-----------|
|    |             | $X_{PCM}$          | $X_{IMP}$ | $X_{PCM}$          | $X_{IMP}$ | $X_{PCM}$     | $X_{IMP}$ |
| 1  | Metacetamol | 0.995              | 0.005     | 0.999              | 0.001     | 0.982         | 0.018     |
| 2  |             | 0.990              | 0.010     | 0.995              | 0.005     | 0.964         | 0.036     |
| 3  |             | 0.980              | 0.020     | 0.990              | 0.010     | 0.937         | 0.063     |
| 4  |             | 0.970              | 0.030     | 0.984              | 0.016     | 0.920         | 0.080     |
| 5  |             | 0.960              | 0.040     | 0.975              | 0.025     | 0.907         | 0.093     |
| 6  |             | 0.904              | 0.096     | 0.932              | 0.068     | 0.848         | 0.152     |
| 7  | (Form II)   | 0.931              | 0.069     | 0.987              | 0.014     | 0.828         | 0.172     |
| 8  | Acetanilide | 0.991              | 0.009     | 0.998              | 0.002     | 0.979         | 0.021     |
| 9  |             | 0.995              | 0.005     | 0.998              | 0.002     | 0.986         | 0.014     |
| 10 |             | 0.983              | 0.017     | 0.997              | 0.003     | 0.955         | 0.045     |
| 11 |             | 0.975              | 0.025     | 0.996              | 0.004     | 0.936         | 0.064     |
| 12 |             | 0.967              | 0.033     | 0.994              | 0.006     | 0.920         | 0.080     |
| 13 |             | 0.950              | 0.050     | 0.992              | 0.008     | 0.885         | 0.115     |

## 3. Polymorphic Form

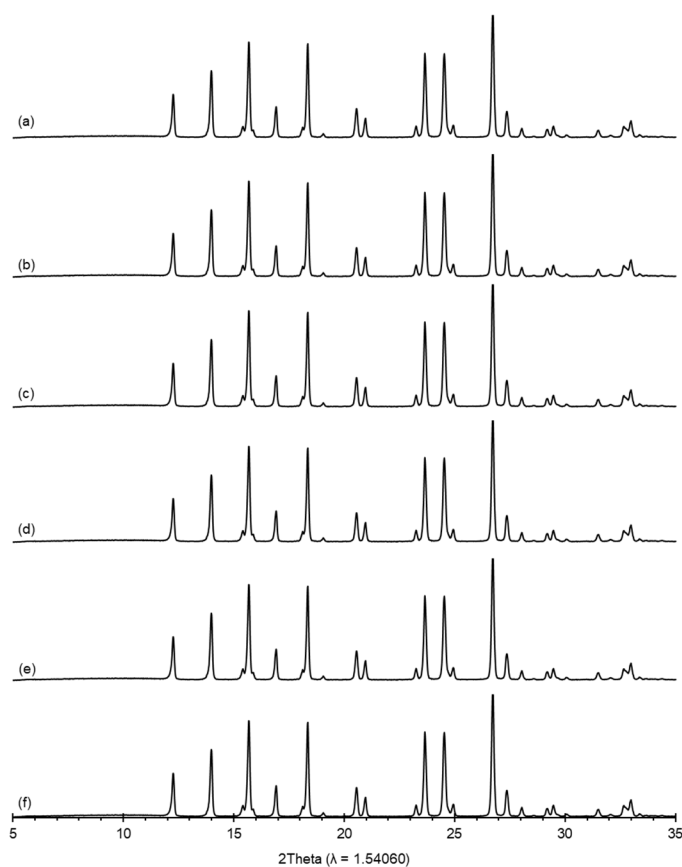

**Figure S4.** XRPD of crystallized paracetamol from 2-propanol in the presence of metacetamol (a)  $X_{i,p} = 0.09$  mol%. (b)  $X_{i,p} = 0.46$  mol%. (c)  $X_{i,p} = 1.01$  mol%. (d)  $X_{i,p} = 1.62$  mol%. (e)  $X_{i,p} = 2.51$  mol%. (f)  $X_{i,p} = 6.78$  mol%.

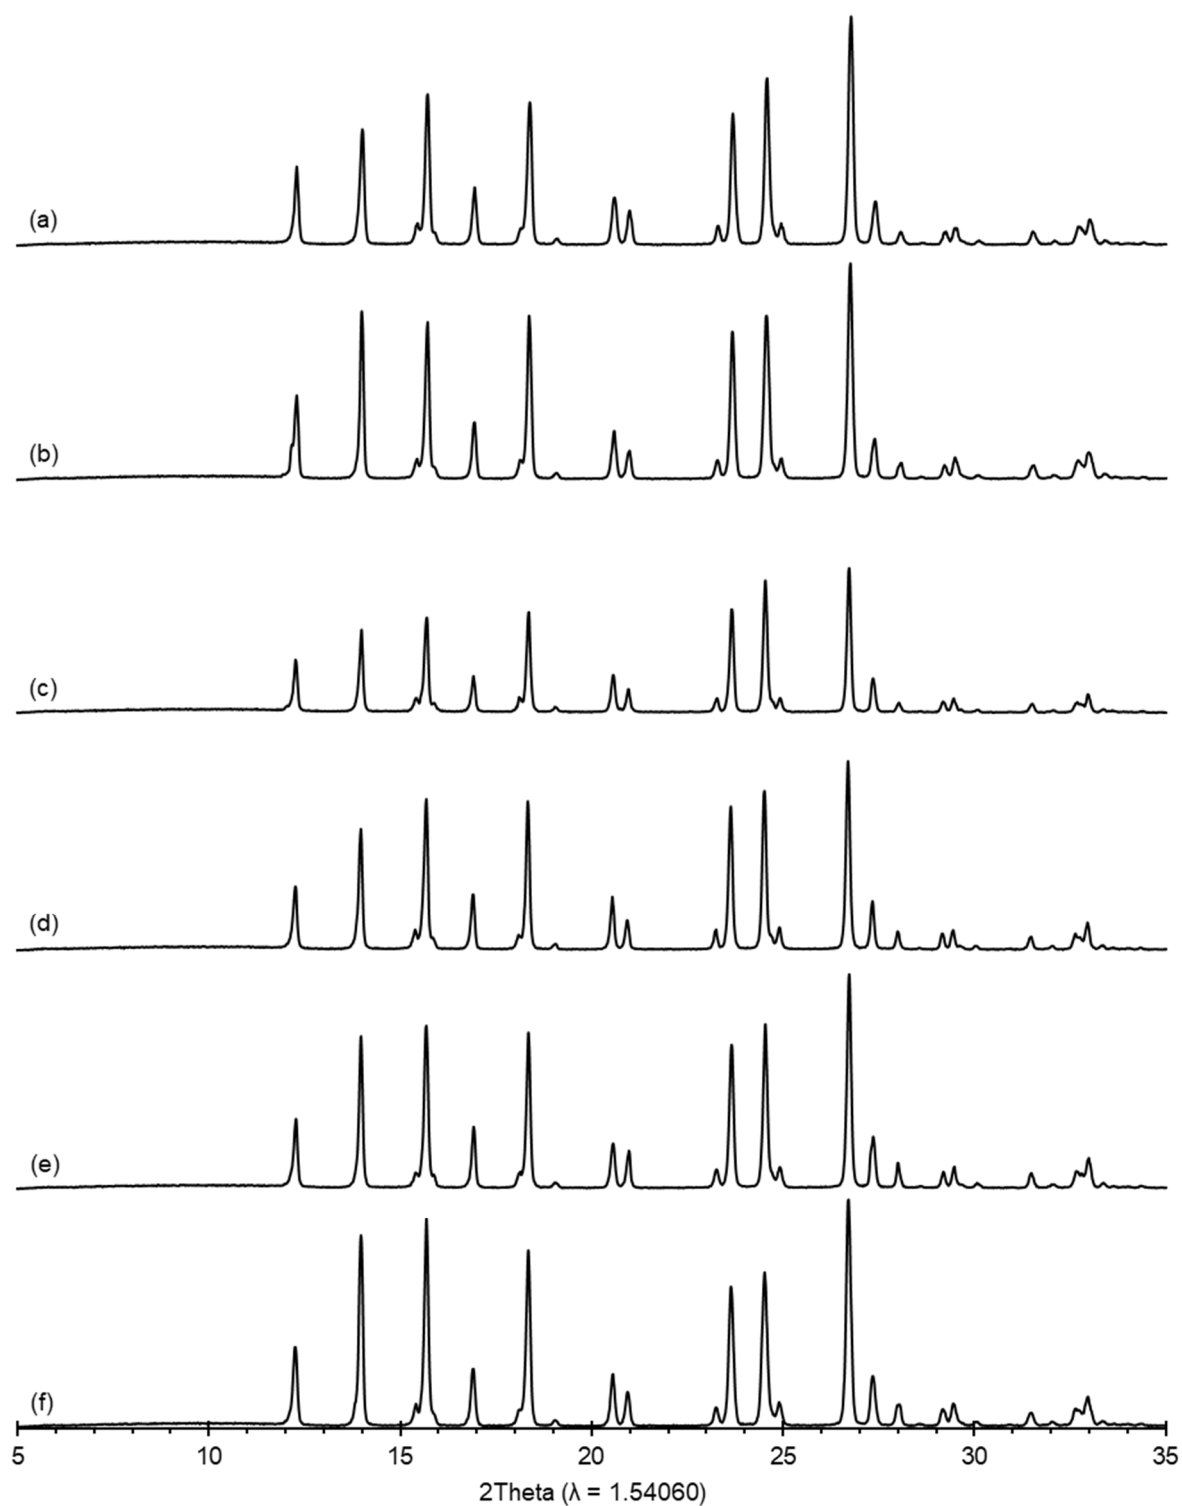

**Figure S5.** XRPD of crystallized paracetamol from 2-propanol in the presence of acetanilide (a)  $X_{i,p} = 0.17$  mol%. (b)  $X_{i,p} = 0.18$  mol%. (c)  $X_{i,p} = 0.31$  mol%. (d)  $X_{i,p} = 0.43$  mol%. (e)  $X_{i,p} = 0.56$  mol%. (f)  $X_{i,p} = 0.79$  mol%.

**Table S2.** Comparative 2Theta peak position at the maximum of the 7 most intense peaks in the XRPD patterns of paracetamol crystallized from 2-propanol in the presence of either metacetamol or acetanilide.

|    | Impurity    | $X_{i,p}$<br>(mol%) | 1      | 2      | 3      | 4      | 5      | 6      | 7      |
|----|-------------|---------------------|--------|--------|--------|--------|--------|--------|--------|
| 1  | Metacetamol | 0.09                | 26.715 | 24.525 | 20.946 | 20.552 | 18.343 | 13.983 | 12.267 |
| 2  |             | 0.46                | 26.741 | 24.556 | 20.969 | 20.571 | 18.362 | 13.996 | 12.277 |
| 3  |             | 1.01                | 26.723 | 24.529 | 20.957 | 20.558 | 18.349 | 13.989 | 12.266 |
| 4  |             | 1.62                | 26.735 | 24.544 | 20.971 | 20.561 | 18.361 | 13.989 | 12.274 |
| 5  |             | 2.51                | 26.747 | 24.546 | 20.979 | 20.567 | 18.365 | 14.015 | 12.278 |
| 6  |             | 6.78                | 26.783 | 24.554 | 21.025 | 20.566 | 18.398 | 14.061 | 12.278 |
| 7  | Acetanilide | 0.18                | 26.767 | 24.574 | 20.987 | 20.59  | 18.379 | 14.005 | 12.291 |
| 8  |             | 0.17                | 26.75  | 24.564 | 20.972 | 20.58  | 18.368 | 13.996 | 12.289 |
| 9  |             | 0.31                | 26.719 | 24.534 | 20.953 | 20.56  | 18.349 | 13.981 | 12.268 |
| 10 |             | 0.43                | 26.692 | 24.506 | 20.925 | 20.539 | 18.331 | 13.964 | 12.254 |
| 11 |             | 0.56                | 26.721 | 24.534 | 20.964 | 20.553 | 18.348 | 13.972 | 12.269 |
| 12 |             | 0.79                | 26.704 | 24.514 | 20.937 | 20.547 | 18.344 | 13.972 | 12.255 |

**Table S3.** Unit cell dimensions determined from Pawley refinements of XRPD patterns of paracetamol crystallized from 2-propanol in the presence of either metacetamol or acetanilide

|    | Impurity    | $X_{i,p}$<br>(mol%) | a (Å)     |          | b (Å)    |          | c (Å)    |          |
|----|-------------|---------------------|-----------|----------|----------|----------|----------|----------|
|    |             |                     | Value     | Error    | Value    | Error    | Value    | Error    |
| 1  | Metacetamol | 0.09                | 7.100114  | 0.000188 | 9.380845 | 0.000272 | 11.70634 | 0.00056  |
| 2  |             | 0.46                | 7.0923586 | 0.000165 | 9.370624 | 0.000242 | 11.69675 | 0.000508 |
| 3  |             | 1.01                | 7.0955971 | 0.000159 | 9.380633 | 0.000233 | 11.70395 | 0.000491 |
| 4  |             | 1.62                | 7.0912404 | 0.000224 | 9.375168 | 0.000339 | 11.70059 | 0.000731 |
| 5  |             | 2.51                | 7.0836917 | 0.000153 | 9.376393 | 0.000228 | 11.69263 | 0.000545 |
| 6  |             | 6.78                | 7.0596954 | 0.000189 | 9.379106 | 0.000279 | 11.67919 | 0.000617 |
| 7  | Acetanilide | 0.18                | 7.0870446 | 0.000181 | 9.364603 | 0.000261 | 11.68297 | 0.000548 |
| 8  |             | 0.17                | 7.0915409 | 0.000205 | 9.369529 | 0.000293 | 11.68878 | 0.000623 |
| 9  |             | 0.31                | 7.0991053 | 0.000175 | 9.378311 | 0.000248 | 11.70708 | 0.000523 |
| 10 |             | 0.43                | 7.1053511 | 0.000153 | 9.389834 | 0.00022  | 11.71763 | 0.000465 |
| 11 |             | 0.56                | 7.1010517 | 0.000178 | 9.379492 | 0.000271 | 11.705   | 0.000554 |
| 12 |             | 0.79                | 7.0998663 | 0.000184 | 9.384272 | 0.000281 | 11.7137  | 0.000587 |

#### 4. Particle Size

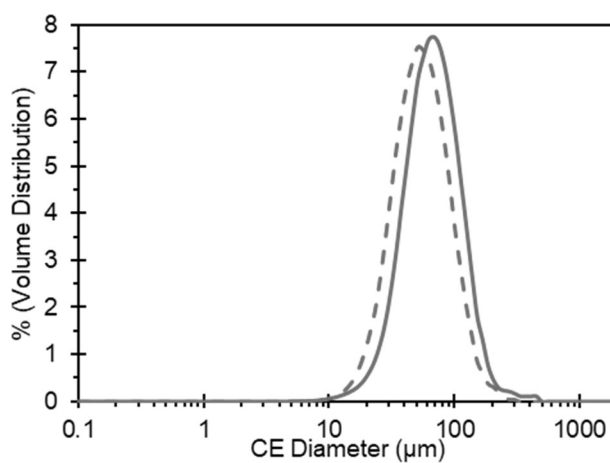

**Figure S6.** CE Diameter measurements of paracetamol crystals grown under the same conditions without added impurity (solid line), and the same crystals after slurry (dashed line).

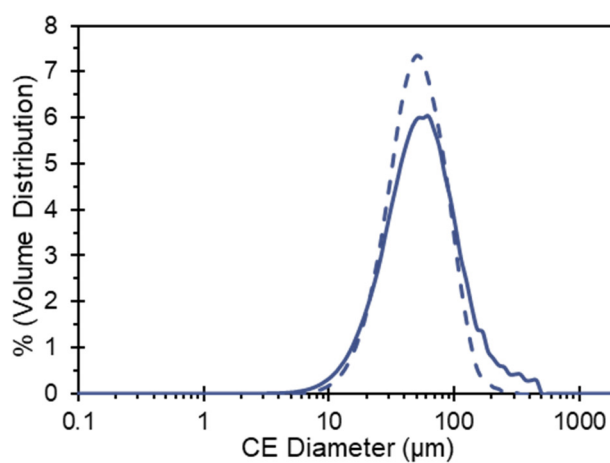

**Figure S7.** CE Diameter measurements of paracetamol form II crystals contaminated with 1.35 mol% metacetamol (solid line) and the stable form I product formed after slurry, contaminated with 0.81 mol% metacetamol (dashed line).

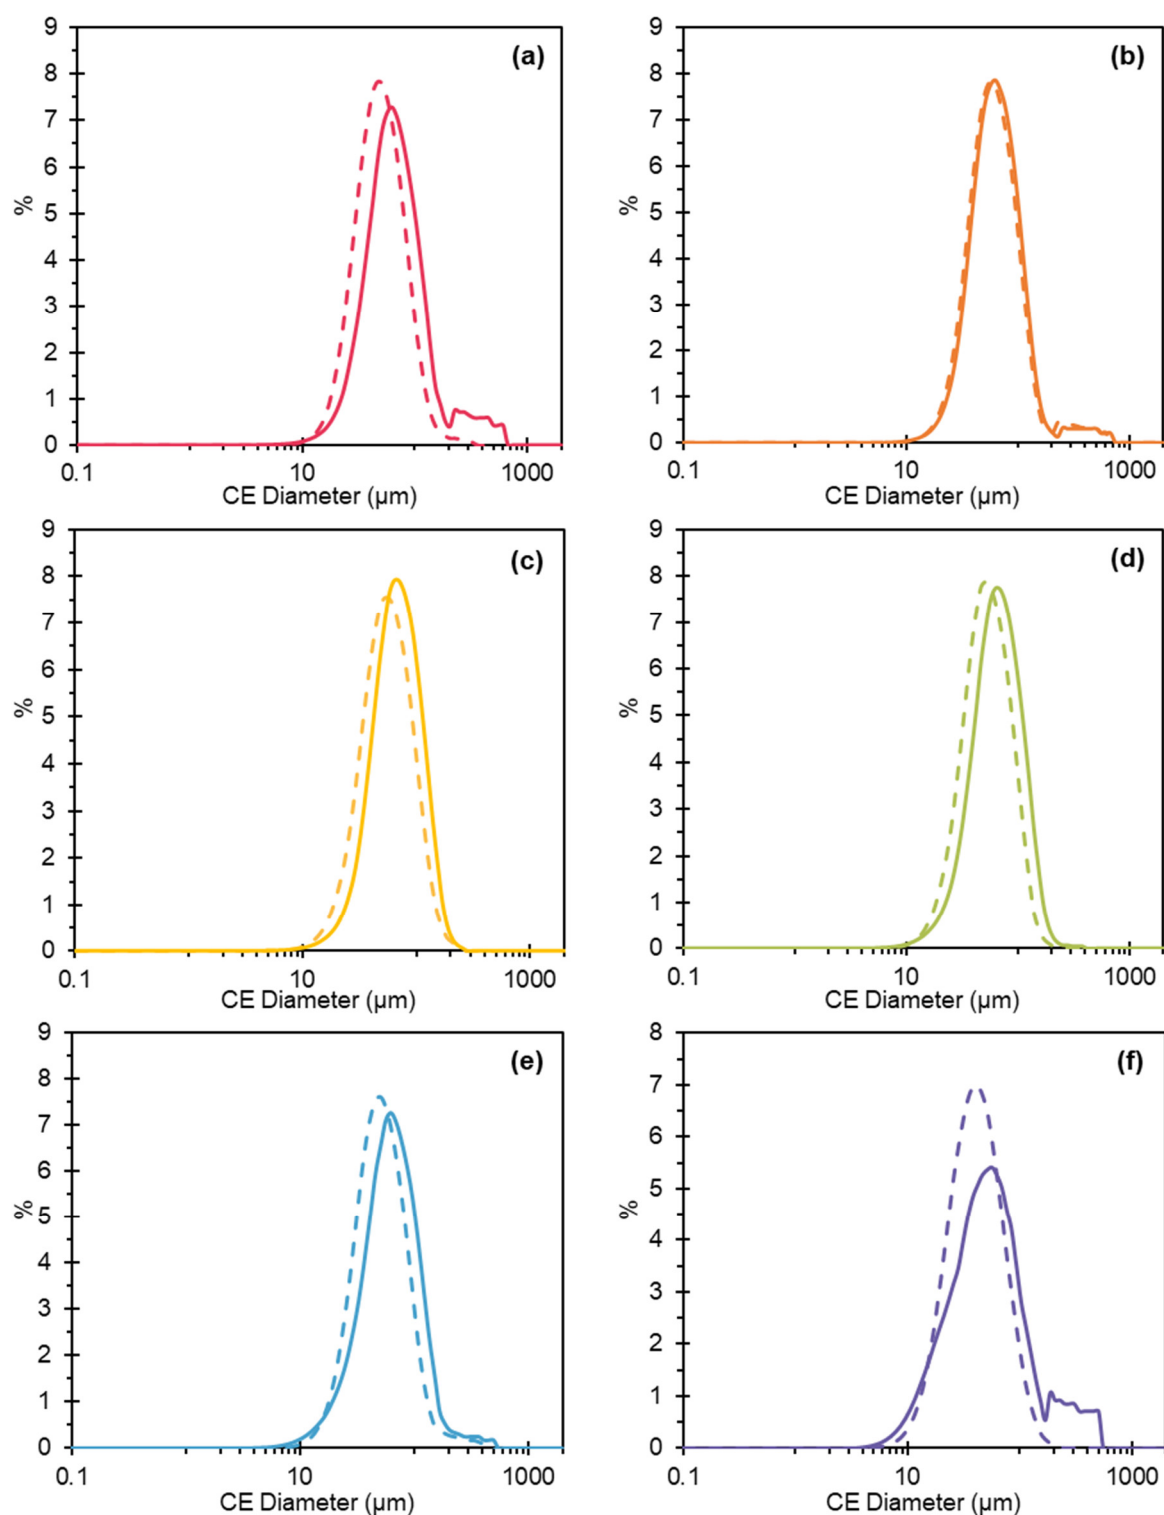

**Figure S8.** CE Diameter (Volume) measurements of PCM contaminated with MET after crystallizations (solid line), then after re-slurry (dashed line). (a)  $X_{i,p} = 0.09$  mol%;  $X_{p,s} = 0.61$  mol%. (b)  $X_{i,p} = 0.46$  mol%;  $X_{p,s} = 0.96$  mol%. (c)  $X_{i,p} = 1.01$  mol%;  $X_{p,s} = 0.63$  mol%. (d)  $X_{i,p} = 1.62$  mol%;  $X_{p,s} = 0.72$  mol%. (e)  $X_{i,p} = 2.51$  mol%;  $X_{p,s} = 1.17$  mol%. (f)  $X_{i,p} = 6.78$  mol%;  $X_{p,s} = 1.54$  mol%.

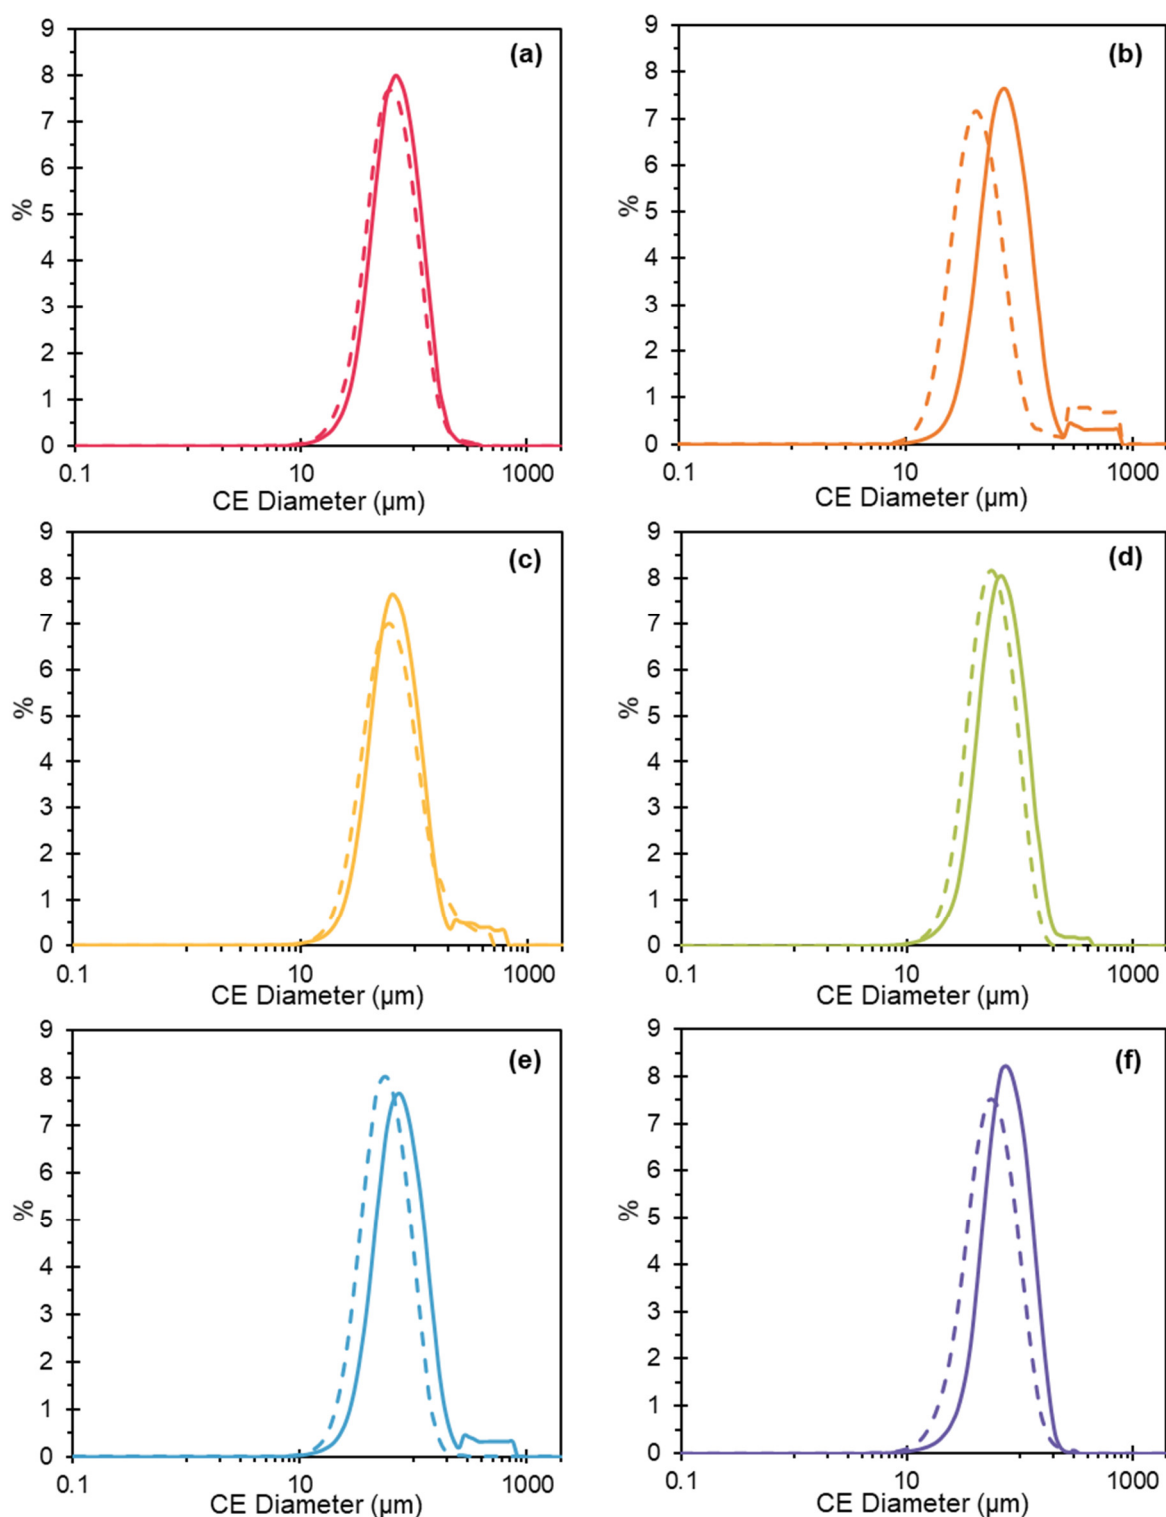

**Figure S9.** CE Diameter (Volume) measurements of PCM contaminated with ACE after crystallizations (solid line), then after re-slurry (dashed line) (a)  $X_{i,p} = 0.17$  mol%;  $X_{p,s} = 0.09$  mol%. (b)  $X_{i,p} = 0.18$  mol%;  $X_{p,s} = 0.10$  mol%. (c)  $X_{i,p} = 0.31$  mol%;  $X_{p,s} = 0.17$  mol%. (d)  $X_{i,p} = 0.43$  mol%;  $X_{p,s} = 0.21$  mol%. (e)  $X_{i,p} = 0.56$  mol%;  $X_{p,s} = 0.23$  mol%. (f)  $X_{i,p} = 0.79$  mol%;  $X_{p,s} = 0.27$  mol%.



**Table S4.** Comparative span measurements from PSD distributions of crystallization and slurry product. Span =  $(D_{90}-D_{10})/D_{50}$ 

| Impurity |             | Crystallization Product |                               |                               |                               |                           | Slurry Product      |                               |                               |                               |                           |
|----------|-------------|-------------------------|-------------------------------|-------------------------------|-------------------------------|---------------------------|---------------------|-------------------------------|-------------------------------|-------------------------------|---------------------------|
|          |             | $C_{imp}$<br>(mol%)     | $D_{10}$<br>( $\mu\text{m}$ ) | $D_{50}$<br>( $\mu\text{m}$ ) | $D_{90}$<br>( $\mu\text{m}$ ) | Span<br>( $\mu\text{m}$ ) | $C_{imp}$<br>(mol%) | $D_{10}$<br>( $\mu\text{m}$ ) | $D_{50}$<br>( $\mu\text{m}$ ) | $D_{90}$<br>( $\mu\text{m}$ ) | Span<br>( $\mu\text{m}$ ) |
| 1        | Metacetamol | 0.09                    | 34.81                         | 62.42                         | 105.20                        | 1.13                      | 0.61                | 28.44                         | 46.79                         | 72.91                         | 0.95                      |
| 2        |             | 0.46                    | 36.98                         | 60.32                         | 91.95                         | 0.91                      | 0.96                | 34.98                         | 57.16                         | 87.84                         | 0.92                      |
| 3        |             | 1.01                    | 37.82                         | 34.78                         | 95.27                         | 0.89                      | 0.63                | 29.84                         | 53.11                         | 83.04                         | 1.00                      |
| 4        |             | 1.62                    | 35.17                         | 63.51                         | 93.75                         | 0.92                      | 0.72                | 29.36                         | 50.86                         | 75.05                         | 0.90                      |
| 5        |             | 2.51                    | 29.81                         | 61.43                         | 94.35                         | 1.05                      | 1.17                | 28.54                         | 48.9                          | 76.35                         | 0.98                      |
| 6        |             | 6.78                    | 18.53                         | 49.95                         | 128.0                         | 2.19                      | 1.57                | 20.82                         | 37.97                         | 67.35                         | 1.23                      |
| 7        | Acetanilide | 0.18                    | 43.26                         | 72.22                         | 113.90                        | 0.98                      | 0.10                | 25.39                         | 42.12                         | 94.84                         | 1.65                      |
| 8        |             | 0.17                    | 40.50                         | 67.29                         | 99.83                         | 0.88                      | 0.09                | 35.00                         | 60.68                         | 92.21                         | 0.94                      |
| 9        |             | 0.31                    | 38.85                         | 64.68                         | 101.6                         | 0.97                      | 0.17                | 33.19                         | 57.95                         | 112.3                         | 1.37                      |
| 10       |             | 0.43                    | 40.94                         | 66.89                         | 97.91                         | 0.85                      | 0.21                | 33.23                         | 54.05                         | 79.32                         | 0.85                      |
| 11       |             | 0.56                    | 40.18                         | 69.32                         | 99.52                         | 0.86                      | 0.23                | 32.70                         | 53.79                         | 80.21                         | 0.88                      |
| 12       |             | 0.79                    | 45.17                         | 73.87                         | 105.4                         | 0.82                      | 0.27                | 29.89                         | 54.21                         | 83.66                         | 0.99                      |

## 5. Morphology

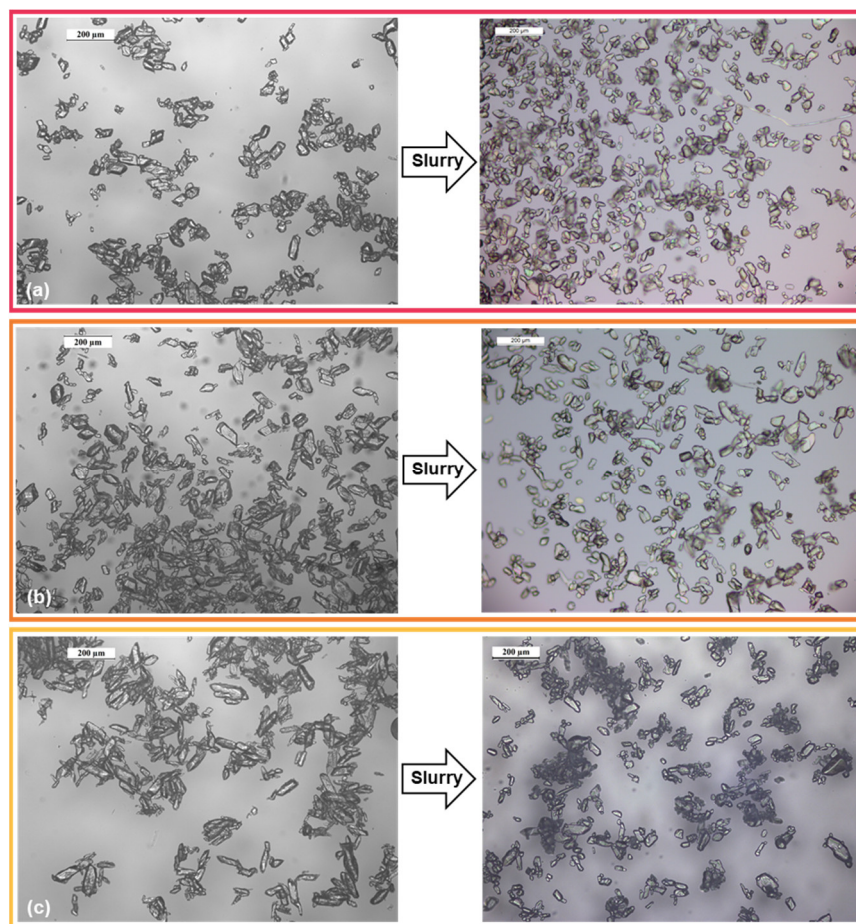

**Figure S10.** Microscopy images of PCM contaminated with MET after crystallizations, then after re-slurry. (a)  $X_{i,p} = 0.09$  mol%;  $X_{p,s} = 0.61$  mol%. (b)  $X_{i,p} = 0.46$  mol%;  $X_{p,s} = 0.96$  mol%. (c)  $X_{i,p} = 1.01$  mol%;  $X_{p,s} = 0.63$  mol%.

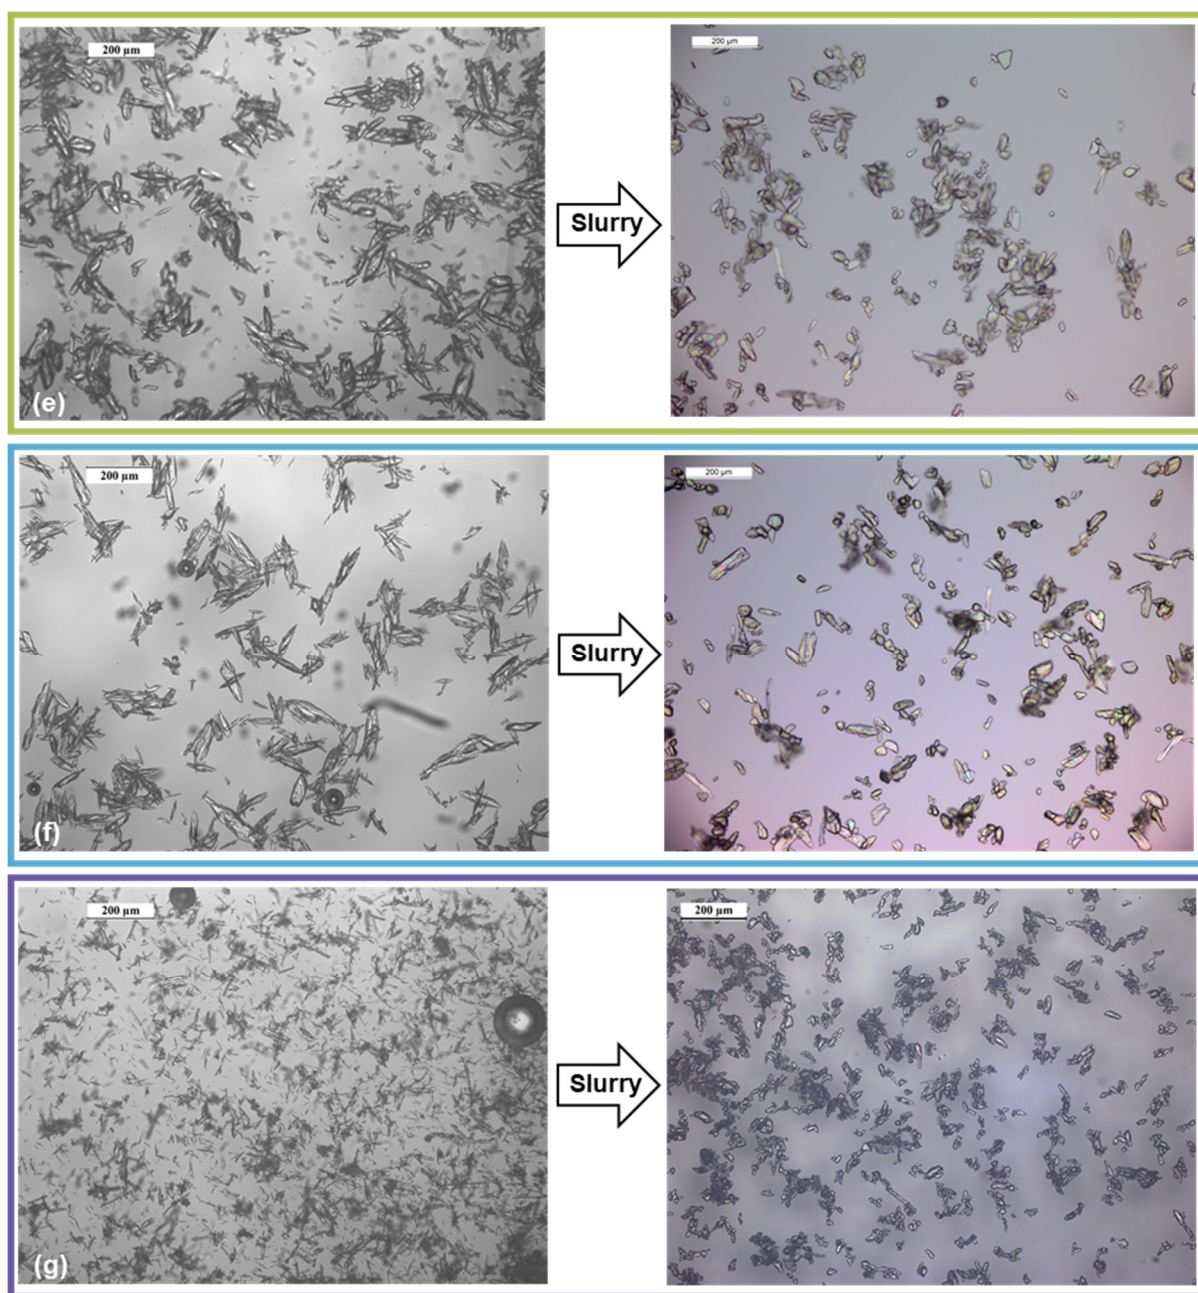

**Figure S11.** Microscopy images of PCM contaminated with MET after crystallizations, then after re-slurry. (a)  $X_{i,p} = 1.62$  mol%;  $X_{p,s} = 0.72$  mol%. (b)  $X_{i,p} = 2.51$  mol%;  $X_{p,s} = 1.17$  mol%. (c)  $X_{i,p} = 6.78$  mol%;  $X_{p,s} = 1.54$  mol%.



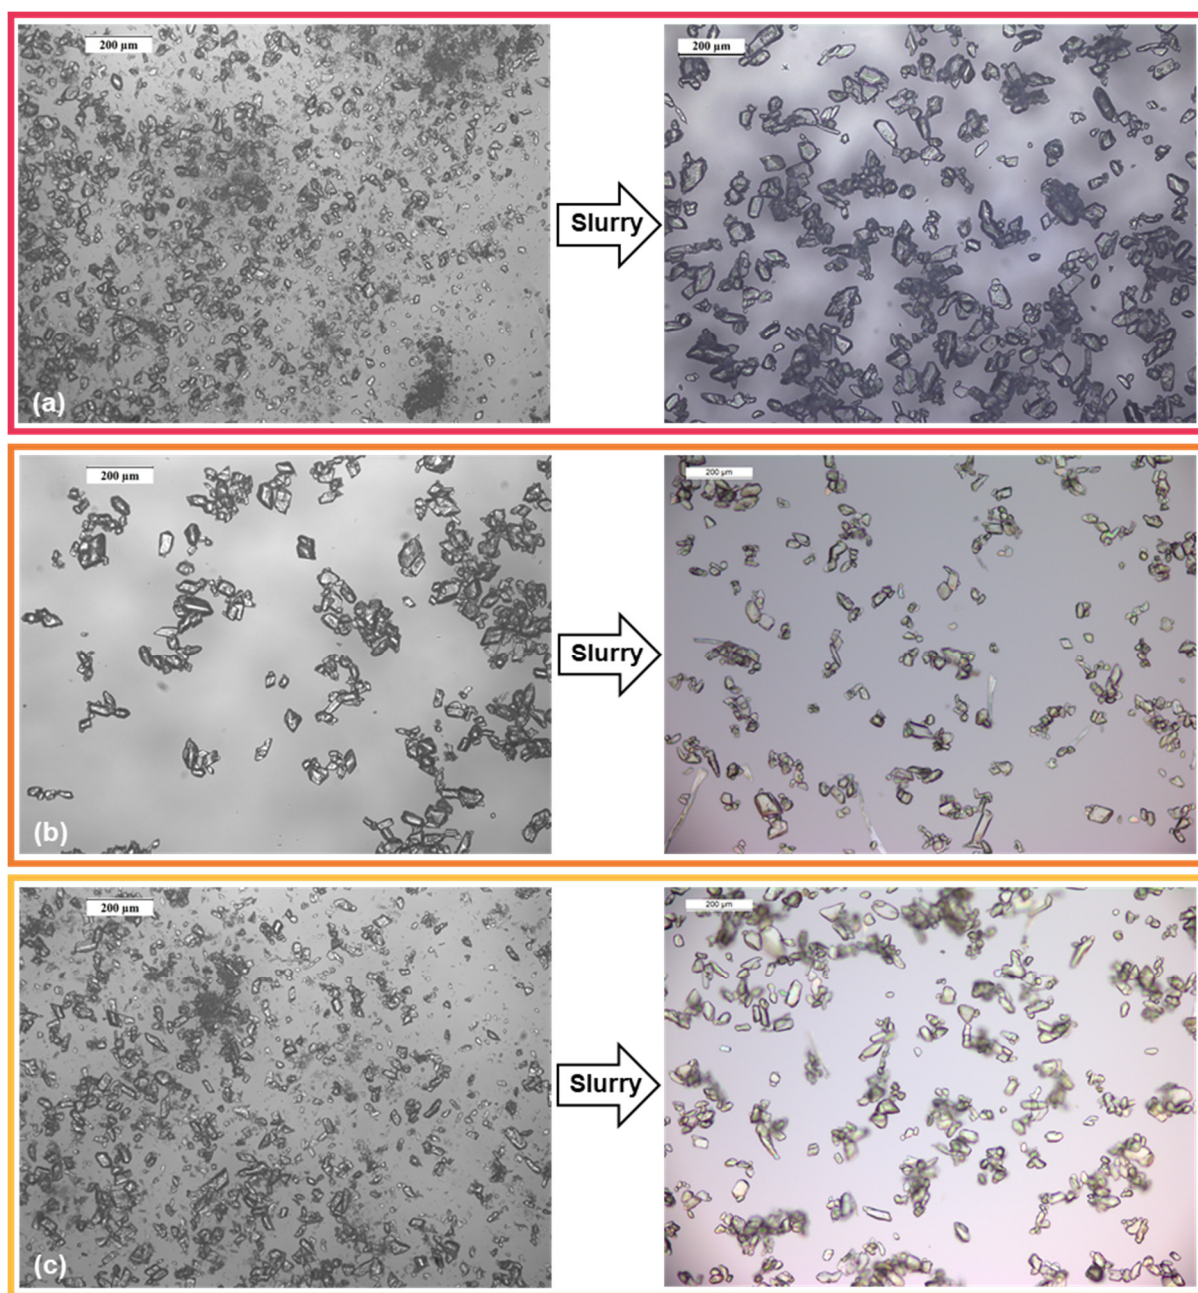

**Figure S12.** Microscopy images of PCM contaminated with ACE after crystallizations, then after re-slurry. (a)  $X_{i,p} = 0.17$  mol%;  $X_{p,s} = 0.09$  mol%. (b)  $X_{i,p} = 0.18$  mol%;  $X_{p,s} = 0.10$  mol%. (c)  $X_{i,p} = 0.31$  mol%;  $X_{p,s} = 0.17$  mol%.

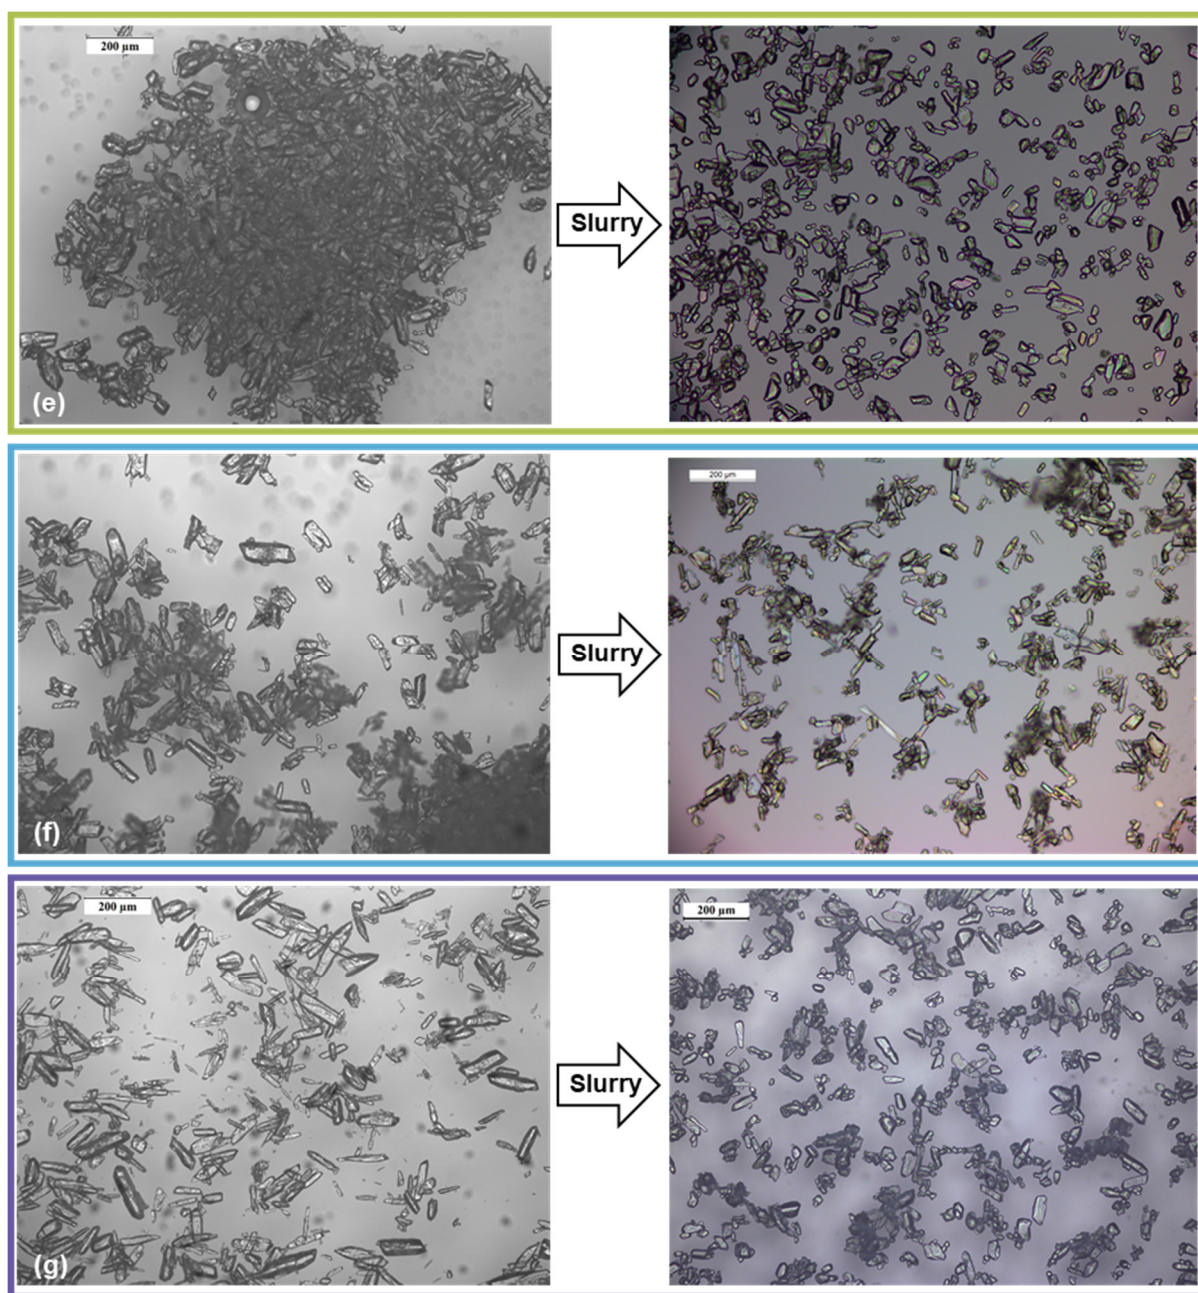

**Figure S13.** Microscopy images of PCM contaminated with ACE after crystallizations, then after re-slurry. (a)  $X_{i,p} = 0.43$  mol%;  $X_{p,s}$  slurry = 0.21 mol%. (b)  $X_{i,p} = 0.56$  mol%;  $X_{p,s} = 0.23$  mol%. (c)  $X_{i,p} = 0.79$  mol%;  $X_{p,s} = 0.27$  mol%.



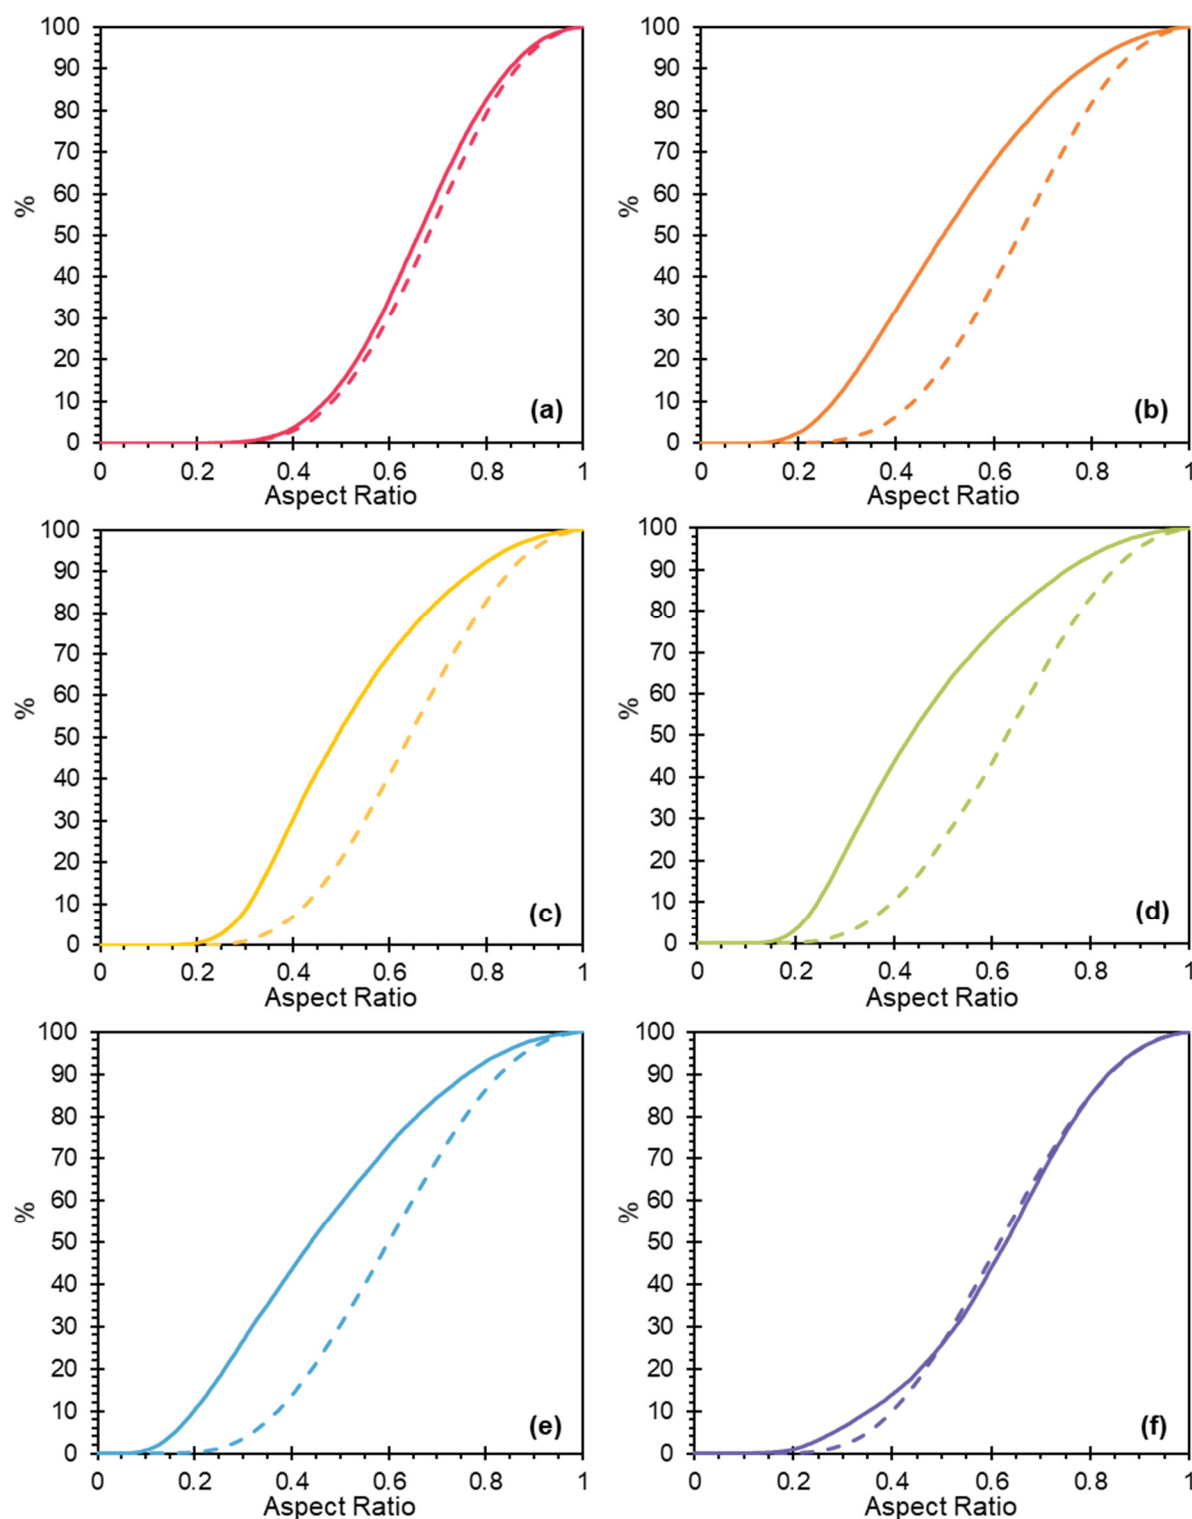

**Figure S14.** Elongation measurements (Malvern Morphologi G3) of PCM contaminated with MET after crystallizations (solid line), then after re-slurry (dashed line). (a)  $X_{i,p} = 0.09$  mol%;  $X_{p,s} = 0.61$  mol%. (b)  $X_{i,p} = 0.46$  mol%;  $X_{p,s} = 0.96$  mol%. (c)  $X_{i,p} = 1.01$  mol%;  $X_{p,s} = 0.63$  mol%. (d)  $X_{i,p} = 1.62$  mol%;  $X_{p,s} = 0.72$  mol%. (e)  $X_{i,p} = 2.51$  mol%;  $X_{p,s} = 1.17$  mol%. (f)  $X_{i,p} = 6.78$  mol%;  $X_{p,s} = 1.54$  mol%.

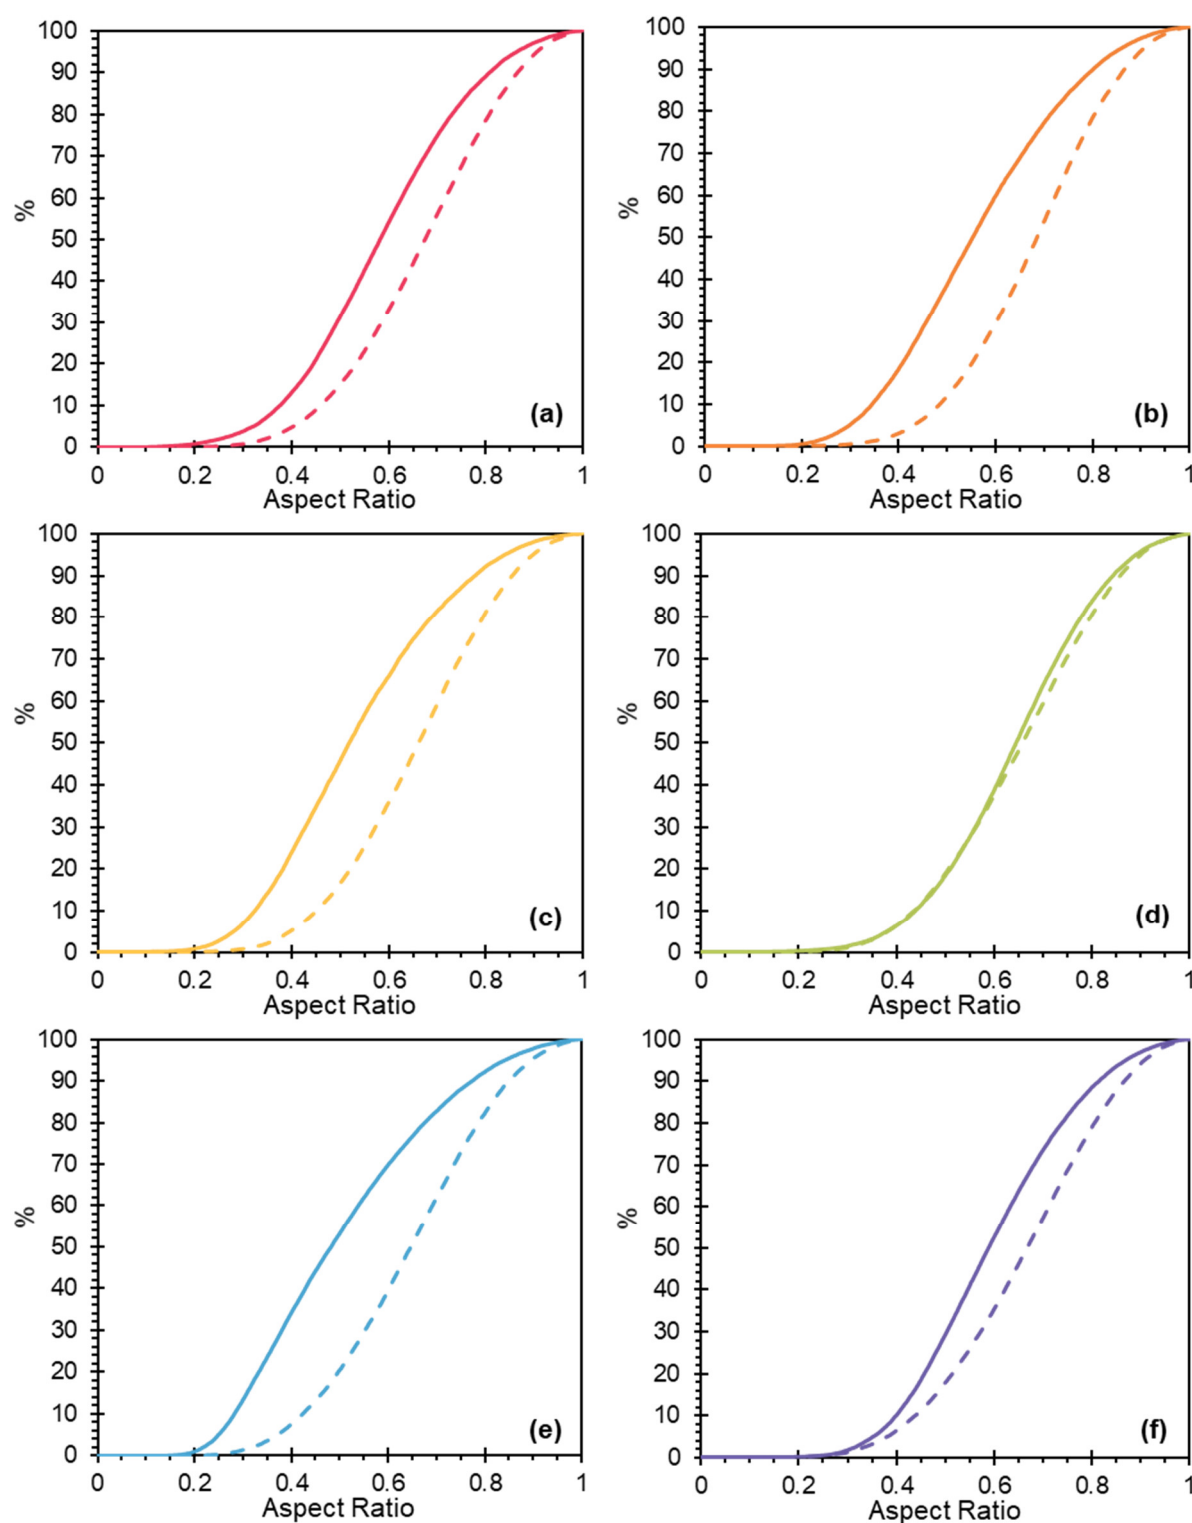

**Figure S15.** Elongation measurements (Malvern Morphologi G3) of PCM contaminated with ACE after crystallizations (solid line), then after re-slurry (dashed line). (a)  $X_{i,p} = 0.17$  mol%;  $X_{p,s} = 0.09$  mol%. (b)  $X_{i,p} = 0.18$  mol%;  $X_{p,s} = 0.10$  mol%. (c)  $X_{i,p} = 0.31$  mol%;  $X_{p,s} = 0.17$  mol%. (d)  $X_{i,p} = 0.43$  mol%;  $X_{p,s} = 0.21$  mol%. (e)  $X_{i,p} = 0.56$  mol%;  $X_{p,s} = 0.23$  mol%. (f)  $X_{i,p} = 0.79$  mol%;  $X_{p,s} = 0.27$  mol%.
